# Supplementary material for: Monitoring Frameworks for Universal Health Coverage: What About High-Income Countries?
Source: PubMed Central journal article supplement (PMC6706973; doi:10.15171/ijhpm.2019.21), 2019-04-22
Supplement: ijhpm-8-387-s001.pdf [file ijhpm-8-387-s001.pdf]

## Supplementary file 1

### **List 1. High Income Countries According to World Bank Classification in June 2017**

Andorra, Antigua and Barbuda, Aruba, Australia, Austria, the Bahamas, Bahrain, Barbados, Belgium, Bermuda, British Virgin Islands, Brunei Darussalam, Canada, Cayman Islands, Channel Islands, Chile, Croatia, Curacao, Cyprus, Czech Republic, Denmark, Estonia, Faroe Islands, Finland, France, French Polynesia, , Germany, Gibraltar, Greece, Greenland, Guam, Hong Kong (SAR, China), Hungary, Iceland, Ireland, Isle of Man, Israel, Italy, Japan, Republic of Korea, Kuwait, Latvia, Liechtenstein, Lithuania, Luxembourg, Macao (SAR, China), Malta, Monaco, Nauru, Netherlands, New Caledonia, New Zealand, Northern Mariana Islands, Norway, Oman, Poland, Portugal, Puerto Rico, Qatar, San Marino, Saudi Arabia, Seychelles, Singapore, Sint Maarten (Dutch part), Slovak Republic, Slovenia, Spain, St. Kitts and Nevis, St. Martin (French part), Sweden, Switzerland, Taiwan (China), Trinidad and Tobago, Turks and Caicos Islands, United Arab Emirates, United Kingdom, United States of America, Uruguay, Virgin Islands (U.S.).

### **List 2. High Income Country Voluntary National Reviews Available from the United Nations Sustainable Development Knowledge Platform in January 2018**

Belgium, Chile, Czech Republic, Denmark, Estonia, Finland, France, Germany, Japan, Luxembourg, Portugal, Monaco, Slovenia, Sweden, Uruguay.

### **List 3. List of High Income Country National Health Reports, gathered in January 2018 from Publicly Available Government Websites**

Australia, Bahrain, Bermuda, Brunei Darussalam, Canada, Cayman Islands, Channel Islands, Croatia, Denmark, Estonia, Germany, Gibraltar, Hong Kong (SAR, China), Ireland, Israel, Nauru, Oman, Qatar, Saudi Arabia, Singapore, Spain, Taiwan, United Kingdom, United States of America.

### **Table S1. Search Strategy for Retrieval of Peer-Reviewed Original Research Articles of Health Interventions in the Context of Universal Health Coverage in High Income Countries**

| Description of search category | PubMed search terms                                                                                                                                                                                                                                                                                                                                                                                                                                                                                                                                                                                                                                                                                                                                                                                                                                                                                                                                                                                                                                                                                                                                                                                                                                                                                                                                                                                                                                                                                                                                                                                                                                                                                                                                                                                                                                                                                                                                                                                                                                                                                                                        |
|--------------------------------|--------------------------------------------------------------------------------------------------------------------------------------------------------------------------------------------------------------------------------------------------------------------------------------------------------------------------------------------------------------------------------------------------------------------------------------------------------------------------------------------------------------------------------------------------------------------------------------------------------------------------------------------------------------------------------------------------------------------------------------------------------------------------------------------------------------------------------------------------------------------------------------------------------------------------------------------------------------------------------------------------------------------------------------------------------------------------------------------------------------------------------------------------------------------------------------------------------------------------------------------------------------------------------------------------------------------------------------------------------------------------------------------------------------------------------------------------------------------------------------------------------------------------------------------------------------------------------------------------------------------------------------------------------------------------------------------------------------------------------------------------------------------------------------------------------------------------------------------------------------------------------------------------------------------------------------------------------------------------------------------------------------------------------------------------------------------------------------------------------------------------------------------|
| High income countries terms    | <p>ANDORRA[MESH] OR “ANTIGUA AND BARBUDA”[MESH] OR ARUBA[MESH] OR AUSTRALIA[MESH] OR AUSTRIA[MESH] OR BAHAMAS[MESH] OR BAHRAIN[MESH] OR BARBADOS[MESH] OR BELGIUM[MESH] OR BERMUDA[MESH] OR “BRITISH VIRGIN ISLANDS”[MESH] OR “BRUNEI DARUSSALAM”[MESH] OR CANADA[MESH] OR “CAYMAN ISLANDS”[MESH] OR “CHANNEL ISLANDS”[MESH] OR CHILE[MESH] OR CROATIA[MESH] OR CURACAO[MESH] OR CYPRUS[MESH] OR “CZECH REPUBLIC”[MESH] OR DENMARK[MESH] OR ESTONIA[MESH] OR FAROE ISLANDS[MESH] OR FINLAND[MESH] OR FRANCE[MESH] OR “FRENCH POLYNESIA”[MESH] OR GERMANY[MESH] OR GIBRALTAR[MESH] OR GREECE[MESH] OR GREENLAND[MESH] OR GUAM[MESH] OR “HONG KONG”[MESH] OR HUNGARY[MESH] OR ICELAND[MESH] OR IRELAND[MESH] OR “ISLE OF MAN”[MESH] OR ISRAEL[MESH] OR ITALY[MESH] OR JAPAN[MESH] OR KOREA[MESH] OR KUWAIT[MESH] OR LATVIA[MESH] OR LIECHTENSTEIN[MESH] OR LITHUANIA[MESH] OR LUXEMBOURG[MESH] OR “MACAO”[MESH] OR MALTA[MESH] OR MONACO[MESH] OR NAURU[MESH] OR NETHERLANDS[MESH] OR “NEW CALEDONIA”[MESH] OR “NEW ZEALAND”[MESH] OR “NORTHERN MARIANA ISLANDS”[MESH] OR NORWAY[MESH] OR OMAN[MESH] OR POLAND[MESH] OR PORTUGAL[MESH] OR “PUERTO RICO”[MESH] OR QATAR[MESH] OR “SAN MARINO”[MESH] OR “SAUDI ARABIA”[MESH] OR SEYCHELLES[MESH] OR SINGAPORE[MESH] OR “SINT MAARTEN”[MESH] OR “SLOVAK REPUBLIC”[MESH] OR SLOVENIA[MESH] OR SPAIN[MESH] OR “ST. KITTS AND NEVIS”[MESH] OR “ST. MARTIN”[MESH] OR SWEDEN[MESH] OR SWITZERLAND[MESH] OR “TRINIDAD AND TOBAGO”[MESH] OR “TURKS AND CAICOS ISLANDS”[MESH] OR “UNITED ARAB EMIRATES”[MESH] OR “UNITED KINGDOM”[MESH] OR “UNITED STATES”[MESH] OR URUGUAY[MESH] OR “VIRGIN ISLANDS”[MESH] OR “DEVELOPED COUNTRIES”[MESH] OR ANDORRA[TIAB] OR “ANTIGUA AND BARBUDA”[TIAB] OR ARUBA[TIAB] OR “AUSTRALIA”[TIAB] OR AUSTRIA[TIAB] OR BAHAMAS[TIAB] OR BAHRAIN[TIAB] OR BARBADOS[TIAB] OR BELGIUM[TIAB] OR BERMUDA[TIAB] OR “BRITISH VIRGIN ISLANDS”[TIAB] OR BRUNEI[TIAB] OR CANADA[TIAB] OR “CAYMAN ISLANDS”[TIAB] OR “CHANNEL ISLANDS”[TIAB] OR CHILE[TIAB] OR CROATIA[TIAB] OR CURACAO[TIAB] OR CYPRUS[TIAB] OR “CZECH REPUBLIC”[TIAB] OR DENMARK[TIAB] OR ESTONIA[TIAB] OR “FAROE</p> |

|                                                                                                                                                          |                                                                                                                                                                                                                                                                                                                                                                                                                                                                                                                                                                                                                                                                                                                                                                                                                                                                                                                                                                                                                                                                                                                                                                                                                                                                                                                                                                                                                           |
|----------------------------------------------------------------------------------------------------------------------------------------------------------|---------------------------------------------------------------------------------------------------------------------------------------------------------------------------------------------------------------------------------------------------------------------------------------------------------------------------------------------------------------------------------------------------------------------------------------------------------------------------------------------------------------------------------------------------------------------------------------------------------------------------------------------------------------------------------------------------------------------------------------------------------------------------------------------------------------------------------------------------------------------------------------------------------------------------------------------------------------------------------------------------------------------------------------------------------------------------------------------------------------------------------------------------------------------------------------------------------------------------------------------------------------------------------------------------------------------------------------------------------------------------------------------------------------------------|
|                                                                                                                                                          | ISLANDS"[TIAB] OR FINLAND[TIAB] OR FRANCE[TIAB] OR "FRENCH POLYNESIA"[TIAB] OR GERMANY[TIAB] OR GIBRALTAR[TIAB] OR GREECE[TIAB] OR GREENLAND[TIAB] OR GUAM[TIAB] OR HOLLAND[TIAB] OR "HONG KONG"[TIAB] OR HUNGARY[TIAB] OR ICELAND[TIAB] OR IRELAND[TIAB] OR "ISLE OF MAN"[TIAB] OR ISRAEL[TIAB] OR ITALY[TIAB] OR JAPAN[TIAB] OR KOREA[TIAB] OR KUWAIT[TIAB] OR LATVIA[TIAB] OR LIECHTENSTEIN[TIAB] OR LITHUANIA[TIAB] OR LUXEMBOURG[TIAB] OR MACAO[TIAB] OR MALTA[TIAB] OR MONACO[TIAB] OR NAURU[TIAB] OR NETHERLANDS[TIAB] OR "NEW CALEDONIA"[TIAB] OR "NEW ZEALAND"[TIAB] OR "NORTHERN MARIANA ISLANDS"[TIAB] OR NORWAY[TIAB] OR OMAN[TIAB] OR POLAND[TIAB] OR PORTUGAL[TIAB] OR "PUERTO RICO"[TIAB] OR QATAR[TIAB] OR "SAN MARINO"[TIAB] OR "SAUDI ARABIA"[TIAB] OR SEYCHELLES[TIAB] OR SINGAPORE[TIAB] OR "SINT MAARTEN"[TIAB] OR "SLOVAK REPUBLIC"[TIAB] OR SLOVENIA[TIAB] OR SPAIN[TIAB] OR "ST. KITTS AND NEVIS"[TIAB] OR "ST. MARTIN"[TIAB] OR SWEDEN[TIAB] OR SWITZERLAND[TIAB] OR "TRINIDAD AND TOBAGO"[TIAB] OR "TURKS AND CAICOS ISLANDS"[TIAB] OR "UNITED ARAB EMIRATES"[TIAB] OR "UNITED KINGDOM"[TIAB] OR "UNITED STATES"[TIAB] OR URUGUAY[TIAB] OR "VIRGIN ISLANDS"[TIAB] OR "DEVELOPED COUNTRIES"[TIAB] OR "DEVELOPED COUNTRY"[TIAB] OR "HIGH-INCOME COUNTRIES"[TIAB] OR "HIGH INCOME COUNTRIES "[TIAB] OR "HIGH-INCOME COUNTRY"[TIAB] OR "HIGH INCOME COUNTRY"[TIAB] OR "FIRST WORLD COUNTRIES"[TIAB] |
|                                                                                                                                                          | AND                                                                                                                                                                                                                                                                                                                                                                                                                                                                                                                                                                                                                                                                                                                                                                                                                                                                                                                                                                                                                                                                                                                                                                                                                                                                                                                                                                                                                       |
| Universal health coverage terms                                                                                                                          | "UNIVERSAL COVERAGE"[MESH] OR "UNIVERSAL COVERAGE"[TIAB] OR "UNIVERSAL HEALTH COVERAGE"[TIAB] OR "UNIVERSAL CARE"[TIAB] OR "UNIVERSAL HEALTH CARE COVERAGE"[TIAB] OR "UNIVERSAL HEALTH CARE"[TIAB] OR "UNIVERSAL HEALTH SYSTEM"[TIAB]                                                                                                                                                                                                                                                                                                                                                                                                                                                                                                                                                                                                                                                                                                                                                                                                                                                                                                                                                                                                                                                                                                                                                                                     |
| <p><i>Note: search filters were applied, limiting the search to English language articles published between January 1, 2000 and January 25, 2018</i></p> |                                                                                                                                                                                                                                                                                                                                                                                                                                                                                                                                                                                                                                                                                                                                                                                                                                                                                                                                                                                                                                                                                                                                                                                                                                                                                                                                                                                                                           |

**Table S2. Health Indicators Compiled from 24 National Health Reports**

| <b>Tracer Area</b>                                      | <b>Tracer Indicator</b>                                                            | <b>Number of Countries</b> | <b>Countries</b>                                                             |
|---------------------------------------------------------|------------------------------------------------------------------------------------|----------------------------|------------------------------------------------------------------------------|
| <b>REPRODUCTIVE, MATERNAL, NEWBORN AND CHILD HEALTH</b> | Percentage of women who were overweight when they became pregnant                  | 3                          | Germany, Channel Islands                                                     |
|                                                         | Receipt of full series of HPV for both male and female adolescents (ages 13-17)    | 2                          | Australia, USA                                                               |
|                                                         | Percentage of children and adolescents (5-19) with untreated dental caries         | 2                          | Germany, USA                                                                 |
|                                                         | The percentage of infants aged 6 months that are partly or fully on breast feeding | 6                          | Croatia, Estonia<br>Germany, Qatar,<br>Taiwan, USA                           |
|                                                         | The percentage of adolescents (2-19 years old) that are obese                      | 5                          | Australia, Bermuda,<br>Channel Islands,<br>Taiwan, USA                       |
|                                                         | The percentage of adolescents under 18 with a food or skin allergy                 | 5                          | Australia, Croatia,<br>Germany, Ireland,<br>USA                              |
|                                                         | Percentage of children and adolescents (5-17) diagnosed with ADHD                  | 2                          | Australia, USA                                                               |
| <b>INFECTIOUS DISEASES</b>                              | Influenza vaccination rates for the elderly aged 65 year+                          | 8                          | Australia, Bermuda,<br>Estonia, Germany,<br>Israel, Singapore,<br>Spain, USA |
|                                                         | Vaccination rates for pneumococcal disease                                         | 1                          | Australia                                                                    |

|                                  |                                                                    |    |                                                                                 |
|----------------------------------|--------------------------------------------------------------------|----|---------------------------------------------------------------------------------|
|                                  | Mortality rates from pneumonia in older people                     | 2  | Australia, Bermuda                                                              |
|                                  | Number of MRSA cases after more than 48 hours of admission         | 2  | Australia, Singapore                                                            |
| <b>NON-COMMUNICABLE DISEASES</b> | In hospital mortality following acute myocardial infarction (AMI). | 1  | Bermuda                                                                         |
|                                  | Prevalence of adults with high cholesterol.                        | 8  | Australia, Bermuda, Brunei Darussalam, Gibraltar, Hong Kong, Israel, Spain, USA |
|                                  | Percentage of smokers trying to quit                               | 1  | Ireland                                                                         |
|                                  | Prevalence of adolescents that report smoking e-cigarettes         | 3  | Australia, Canada, USA                                                          |
|                                  | Drug poisoning death rate involving heroin or opioid analgesics.   | 1  | USA                                                                             |
|                                  | Number of people treated for drug abuse                            | 1  | Croatia                                                                         |
|                                  | Colorectal cancer screening.                                       | 7  | Australia, Brunei Darussalam, Croatia, Denmark, Gibraltar, Israel, USA          |
|                                  | Breast cancer Screening                                            | 10 | Australia, Bermuda, Brunei Darussalam, Croatia, Denmark,                        |

|  |                                                                                                                                    |   |                                                                                               |
|--|------------------------------------------------------------------------------------------------------------------------------------|---|-----------------------------------------------------------------------------------------------|
|  |                                                                                                                                    |   | Germany, Gibraltar, Israel, Spain, USA                                                        |
|  | The proportion of adults obese or overweight                                                                                       | 9 | Australia, Bermuda, Brunei Darussalam, Channel Islands, Croatia, Estonia, Israel, Taiwan, USA |
|  | Percentage of people with anxiety disorders, depression, sleep disorders and alcoholism                                            | 4 | Australia, Channel Islands, Croatia, Germany                                                  |
|  | Percentage of People with dementia                                                                                                 | 2 | Australia, Germany                                                                            |
|  | Percentage of people who have a partner or a close family member that has/had dementia                                             | 1 | Ireland                                                                                       |
|  | Number of new cases of treated end-stage kidney disease (ESKD) or end-stage renal failure (ESRF)                                   | 4 | Australia, Bermuda, Israel, Saudi Arabia                                                      |
|  | Percentage of people who sometimes or always need help with core activities of daily living (mobility, self-care or communication) | 1 | Australia                                                                                     |
|  | Percentage of adults with pain in the lumbar spine, osteoarthritis or cervical back pain                                           | 4 | Australia, Germany, Spain, USA                                                                |

|                                              |                                                                                                                                        |   |                                    |
|----------------------------------------------|----------------------------------------------------------------------------------------------------------------------------------------|---|------------------------------------|
| <b>SERVICE<br/>CAPACITY AND<br/>ACCESS</b>   | The average experienced waiting time for planned hospital surgery                                                                      | 2 | Australia, Denmark                 |
|                                              | Average wait time for patients who are to have an initial consultation at the specialised care level.                                  | 2 | Australia, Spain                   |
|                                              | Average length of stay (ALOS)                                                                                                          | 3 | Australia, Bermuda, USA            |
|                                              | The percentage of people who self-assess their health as excellent or very good.                                                       | 4 | Australia, Bermuda, Estonia, Spain |
| <b>SOCIAL<br/>DETERMINANTS<br/>OF HEALTH</b> | The percentage of people that say they have a somewhat or a very strong sense of community belonging.                                  | 1 | Canada                             |
|                                              | Health literacy level above the minimum level regarded as necessary for understanding and using information relating to health issues. | 2 | Australia, Canada                  |
|                                              | Sea quality, air quality and soil quality.                                                                                             | 2 | Australia, Croatia                 |
